# Supplementary material for: Jugendliches Alkoholkonsumverhalten während der COVID-19-Pandemie und die Bedeutung von Achtsamkeit
Source: Atypon-hosted journal article supplement (doi:10.1024/0939-5911/a000734), 2021-12-01
Supplement: 0939-5911_a000734_esm1.pdf [file 0939-5911_a000734_esm1.pdf]

# Elektronisches Supplement

## ESM 1. Beispielitems des CRISIS-Fragebogens

Emotionen und soziales Erleben werden im CRISIS Fragebogen durch einpolige und zweipolige Items erfasst.

*Beispiel für einpoliges Item:*

„Während der letzten 14 Tage: Wie besorgt warst du im Allgemeinen?“

5-stufige Antwortskala: 0 = „überhaupt nicht besorgt“ bis 4 = „sehr besorgt“

*Beispiel für zweipoliges Item:*

„Während der letzten 14 Tage: Wie glücklich oder traurig warst du?“

5-stufige Antwortskala: -2 = „sehr traurig“, -1 = „mäßig traurig“, 0 = „neutral“,  
1 = „mäßig glücklich“, 2 = „sehr glücklich“
