# Supplementary material for: Jugendliches Alkoholkonsumverhalten während der COVID-19-Pandemie und die Bedeutung von Achtsamkeit
Source: Atypon-hosted journal article supplement (doi:10.1024/0939-5911/a000734), 2021-12-01
Supplement: 0939-5911_a000734_esm2.pdf [file 0939-5911_a000734_esm2.pdf]

**ESM 2.** Verlauf zweipoliger Items getrennt für jeden Teilnehmenden über die Messzeitpunkte

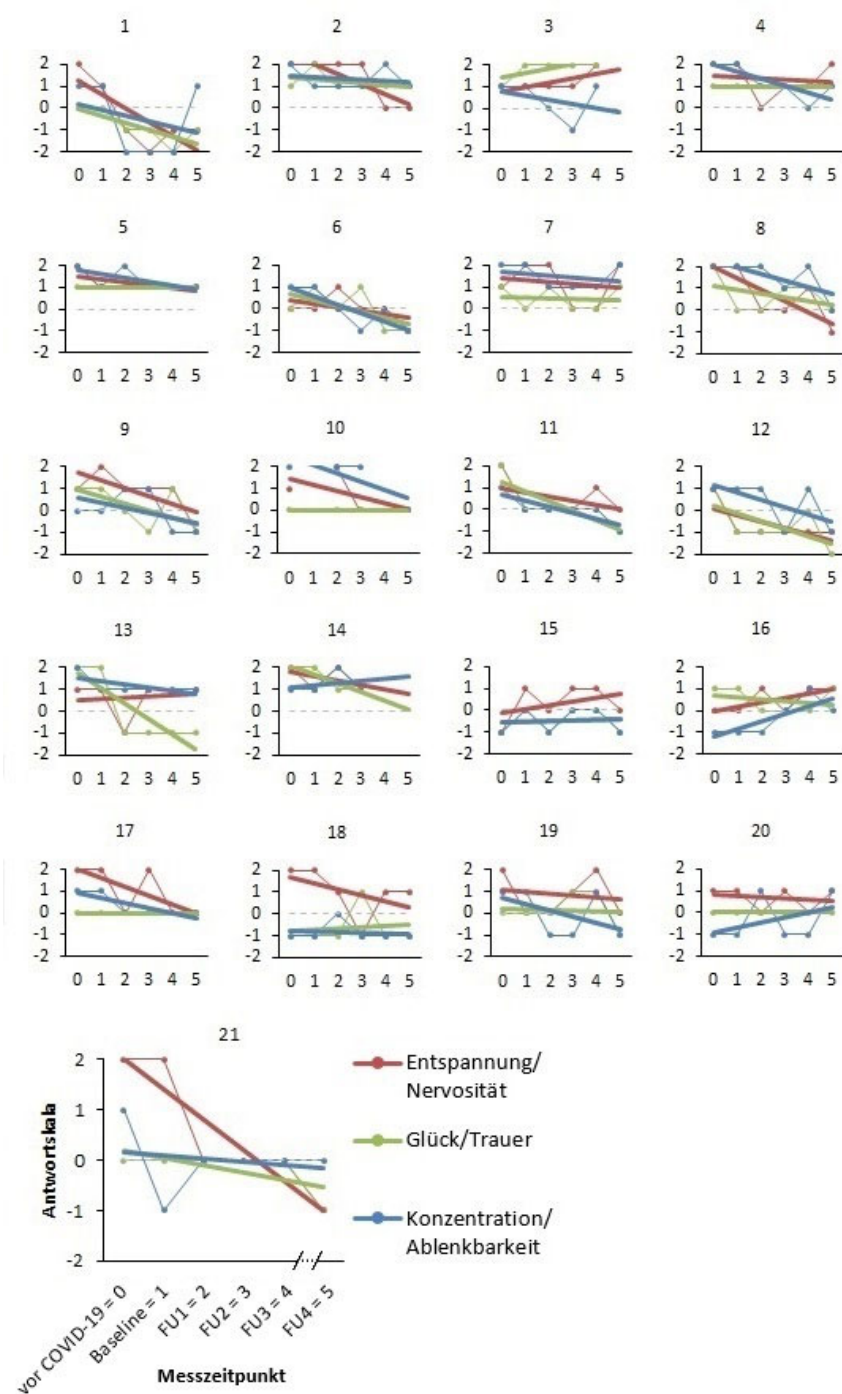

*Anmerkungen.* Die gestrichelte, graue Linie entspricht der Kategorie „neutral“ und dient der besseren Übersicht innerhalb der Grafik. Negative Ausprägung der Emotion (z.B. Nervosität) ist am negativen Pol, positive Ausprägung der Emotion (z.B. Entspannung) ist am positiven Pol abgetragen. Regressionslinien bilden den allgemeinen Trend über alle Messzeitpunkte ab. Messwiederholungsmodelle wurden nicht signifikant (alle  $p > .05$ ).
