# Supplementary material for: Jugendliches Alkoholkonsumverhalten während der COVID-19-Pandemie und die Bedeutung von Achtsamkeit
Source: Atypon-hosted journal article supplement (doi:10.1024/0939-5911/a000734), 2021-12-01
Supplement: 0939-5911_a000734_esm3.pdf [file 0939-5911_a000734_esm3.pdf]

**ESM 3.** Verlauf einpoliger Items getrennt für jeden Teilnehmenden über die Messzeitpunkte

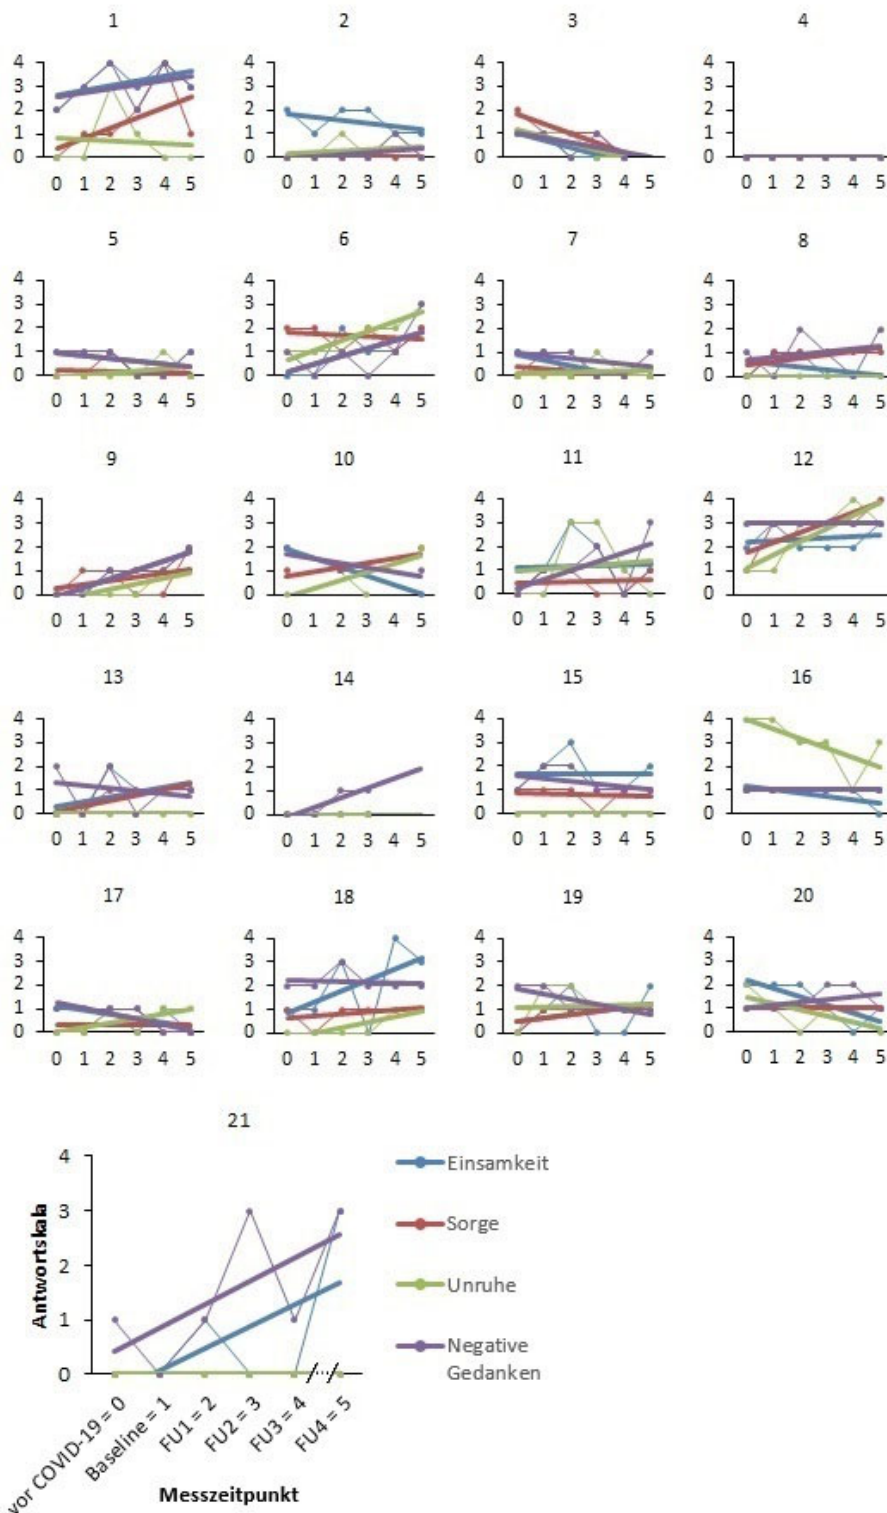

*Anmerkungen.* Regressionslinien bilden den allgemeinen Trend über alle Messzeitpunkte ab. Messwiederholungsmodelle wurden nicht signifikant (alle  $p > .05$ ).
