# Supplementary material for: Jugendliches Alkoholkonsumverhalten während der COVID-19-Pandemie und die Bedeutung von Achtsamkeit
Source: Atypon-hosted journal article supplement (doi:10.1024/0939-5911/a000734), 2021-12-01
Supplement: 0939-5911_a000734_esm4.pdf [file 0939-5911_a000734_esm4.pdf]

#### ESM 4. Partielle Korrelationen der Faktoren mit Alkohol zu allen Erhebungszeitpunkten

|          |                    | Erschöpfung                  |                    |                    |                    |                    |
|----------|--------------------|------------------------------|--------------------|--------------------|--------------------|--------------------|
| Alkohol  | Vor C-19           | Baseline                     | FU1                | FU2                | FU3                | FU4                |
| Vor C-19 | .474 <sup>†</sup>  | .107                         | .139               | .481 <sup>†</sup>  | .454 <sup>†</sup>  | .019               |
| Baseline | .659**             | .290                         | .336               | .655**             | .615*              | .362               |
| FU1      | .530*              | .220                         | .432               | .645**             | .591*              | .524*              |
| FU2      | .595*              | .569*                        | .469 <sup>†</sup>  | .635*              | .635*              | .369               |
| FU3      | .396               | .169                         | .478 <sup>†</sup>  | .561*              | .477 <sup>†</sup>  | .476 <sup>†</sup>  |
| FU4      | .708**             | .481 <sup>†</sup>            | .549*              | .810***            | .716**             | .290               |
|          |                    | Unruhe                       |                    |                    |                    |                    |
| Vor C-19 | .314               | .175                         | .315               | .166               | .277               | .247               |
| Baseline | .131               | .072                         | .558*              | .245               | .362               | .352               |
| FU1      | .133               | .229                         | .855***            | .551*              | .440               | .302               |
| FU2      | -.103              | -.270                        | .414               | .226               | .131               | -.105              |
| FU3      | .277               | .390                         | .823***            | .537*              | .178               | .211               |
| FU4      | .009               | -.038                        | .387               | .099               | .076               | .037               |
|          |                    | Einsamkeit                   |                    |                    |                    |                    |
| Vor C-19 | .607*              | .592*                        | .071               | .094               | .490 <sup>†</sup>  | .192               |
| Baseline | .660**             | .760**                       | .505 <sup>†</sup>  | .427               | .843***            | .557*              |
| FU1      | .554*              | .799***                      | .422               | .602*              | .469 <sup>†</sup>  | .556*              |
| FU2      | .613*              | .733**                       | .708**             | .740**             | .686**             | .660**             |
| FU3      | .477 <sup>†</sup>  | .740**                       | .458 <sup>†</sup>  | .554*              | .390               | .474 <sup>†</sup>  |
| FU4      | .476 <sup>†</sup>  | .574*                        | .487 <sup>†</sup>  | .394               | .737**             | .487 <sup>†</sup>  |
|          |                    | Sorge                        |                    |                    |                    |                    |
| Vor C-19 | .237               | .157                         | .410               | .387               | .498 <sup>†</sup>  | .204               |
| Baseline | .340               | .406                         | .606*              | .652**             | .812***            | .501 <sup>†</sup>  |
| FU1      | .149               | .691**                       | .638**             | .701**             | .896***            | .636*              |
| FU2      | .138               | .378                         | .360               | .432               | .773**             | .425               |
| FU3      | .164               | .588*                        | .422               | .544*              | .824***            | .461 <sup>†</sup>  |
| FU4      | .176               | .167                         | .255               | .421               | .709**             | .272               |
|          |                    | Glück/Trauer                 |                    |                    |                    |                    |
| Vor C-19 | -.479 <sup>†</sup> | -.619*                       | -.251              | -.209              | -.234              | .012               |
| Baseline | -.573*             | -.786**                      | -.685**            | -.417              | -.563*             | -.459 <sup>†</sup> |
| FU1      | -.258              | -.615*                       | -.499 <sup>†</sup> | -.499 <sup>†</sup> | -.332              | -.522*             |
| FU2      | -.330              | -.635*                       | -.581*             | -.528*             | -.615*             | -.541*             |
| FU3      | -.376              | -.560*                       | -.469 <sup>†</sup> | -.451 <sup>†</sup> | -.347              | -.421              |
| FU4      | -.462 <sup>†</sup> | -.594*                       | -.457 <sup>†</sup> | -.188              | -.473 <sup>†</sup> | -.279              |
|          |                    | Entspannung/ Nervosität      |                    |                    |                    |                    |
| Vor C-19 | -.025              | -.135                        | -.301              | -.395              | -.404              | .175               |
| Baseline | -.138              | -.243                        | -.383              | -.681**            | -.586*             | -.263              |
| FU1      | -.069              | -.614*                       | -.533*             | -.626*             | -.574*             | -.406              |
| FU2      | .017               | -.163                        | -.407              | -.762**            | -.649**            | -.283              |
| FU3      | -.174              | -.548*                       | -.459 <sup>†</sup> | -.579*             | -.400              | -.319              |
| FU4      | .107               | -.092                        | -.387              | -.692**            | -.354              | .050               |
|          |                    | Konzentration/ Ablenkbarkeit |                    |                    |                    |                    |
| Vor C-19 | -.416              | -.161                        | -.231              | -.449 <sup>†</sup> | -.475 <sup>†</sup> | .083               |
| Baseline | -.446 <sup>†</sup> | -.161                        | -.468 <sup>†</sup> | -.667**            | -.450 <sup>†</sup> | -.246              |
| FU1      | -.141              | -.074                        | -.420              | -.687**            | -.280              | -.136              |
| FU2      | -.286              | -.191                        | -.332              | -.634*             | -.633*             | .019               |
| FU3      | -.362              | -.110                        | -.622*             | -.731**            | -.398              | -.109              |
| FU4      | -.314              | -.084                        | -.407              | -.608*             | -.598*             | .005               |

Anmerkungen. Partielle Korrelationen wurden kontrolliert für Alter, Geschlecht und AUDIT.

Vor C-19 = vor COVID-19; <sup>†</sup>  $p < .1$ ; \*  $p < .05$ ; \*\*  $p < .01$ ; \*\*\*  $p < .001$ .
