# Supplementary material for: Jugendliches Alkoholkonsumverhalten während der COVID-19-Pandemie und die Bedeutung von Achtsamkeit
Source: Atypon-hosted journal article supplement (doi:10.1024/0939-5911/a000734), 2021-12-01
Supplement: 0939-5911_a000734_esm5.pdf [file 0939-5911_a000734_esm5.pdf]

**ESM 5. Moderationsmodelle für Prädiktor zu FU3 und Alkoholkonsum zu FU4 mit Moderator MAAS-A**

| Modell                 |                            | $R^2*$ | $F$ (df1,df2) | $p$  | $b$    | $SE$  | 95% KI |       | $p$  |
|------------------------|----------------------------|--------|---------------|------|--------|-------|--------|-------|------|
|                        |                            |        |               |      |        |       | UG     | OG    |      |
| Erschöpfung            |                            | .852   | 8.25 (7,10)   | .002 |        |       |        |       |      |
|                        | Konstante                  |        |               |      | -2.059 | 2.531 | -7.699 | 3.581 | .435 |
|                        | Erschöpfung                |        |               |      | .634   | .530  | -.547  | 1.816 | .259 |
|                        | MAAS-A                     |        |               |      | .299   | .440  | -.682  | 1.281 | .512 |
|                        | Erschöpfung x MAAS-A       | (.010) |               |      | -.109  | .132  | -.403  | .184  | .425 |
|                        | Alter                      |        |               |      | .057   | .101  | -.169  | .283  | .588 |
|                        | Geschlecht                 |        |               |      | -.009  | .244  | -.553  | .536  | .972 |
|                        | Alkohol vor COVID-19       |        |               |      | .347   | .091  | .143   | .550  | .004 |
|                        | Erschöpfung vor COVID-19   |        |               |      | .095   | .100  | -.127  | .317  | .362 |
| Unruhe                 |                            | .690   | 3.179 (7,10)  | .048 |        |       |        |       |      |
|                        | Konstante                  |        |               |      | 1.150  | 3.039 | -5.623 | 7.922 | .713 |
|                        | Unruhe                     |        |               |      | -.066  | 1.226 | -2.798 | 2.666 | .958 |
|                        | MAAS-A                     |        |               |      | -.180  | .559  | -1.425 | 1.065 | .753 |
|                        | Unruhe x MAAS-A            | (.000) |               |      | -.001  | .314  | -.702  | .700  | .998 |
|                        | Alter                      |        |               |      | .029   | .131  | -.264  | .321  | .830 |
|                        | Geschlecht                 |        |               |      | -.020  | .341  | -.780  | .740  | .955 |
|                        | Alkohol vor COVID-19       |        |               |      | .453   | .124  | .178   | .729  | .004 |
|                        | Unruhe vor COVID-19        |        |               |      | -.061  | .121  | -.331  | .210  | .627 |
| Entspannung/Nervosität |                            | .815   | 6.291 (7,10)  | .005 |        |       |        |       |      |
|                        | Konstante                  |        |               |      | -.281  | 1.961 | -4.651 | 4.089 | .889 |
|                        | Entspannung/Nerv.          |        |               |      | -2.141 | .799  | -3.921 | -.361 | .023 |
|                        | MAAS-A                     |        |               |      | -.476  | .181  | -.879  | -.073 | .025 |
|                        | Entspannung/Nerv. x MAAS-A | (.122) |               |      | .531   | .207  | .070   | .993  | .028 |
|                        | Alter                      |        |               |      | .157   | .110  | -.088  | .402  | .184 |
|                        | Geschlecht                 |        |               |      | .291   | .259  | -.286  | .868  | .287 |
|                        | Alkohol vor COVID-19       |        |               |      | .300   | .094  | .092   | .508  | .009 |
|                        | Entspannung vor COVID-19   |        |               |      | .050   | .092  | -.156  | .255  | .603 |

*Anmerkungen.* „Modell“ gibt an, welcher Prädiktor eingesetzt wurde. 95% KI = 95% Konfidenzintervall; UG = Untere Grenze; OG = Obere Grenze; SE = Standardfehler; \* = die durch die Moderation entstehenden Änderungen in  $R^2$  werden in Klammern dargestellt. Modelle wurden aufgrund der kleinen Stichprobe nicht für multiples Testen korrigiert. Modelle wurden aufgrund der geringen Stichprobengröße nicht für multiples Testen korrigiert.
