# Supplementary material for: Jugendliches Alkoholkonsumverhalten während der COVID-19-Pandemie und die Bedeutung von Achtsamkeit
Source: Atypon-hosted journal article supplement (doi:10.1024/0939-5911/a000734), 2021-12-01
Supplement: 0939-5911_a000734_esm6.pdf [file 0939-5911_a000734_esm6.pdf]

**ESM 6.** Signifikantes Moderationsmodell für Entspannung/Nervosität zu FU3 und Alkoholkonsum zu FU4 moderiert durch Achtsamkeit (MAAS-A)

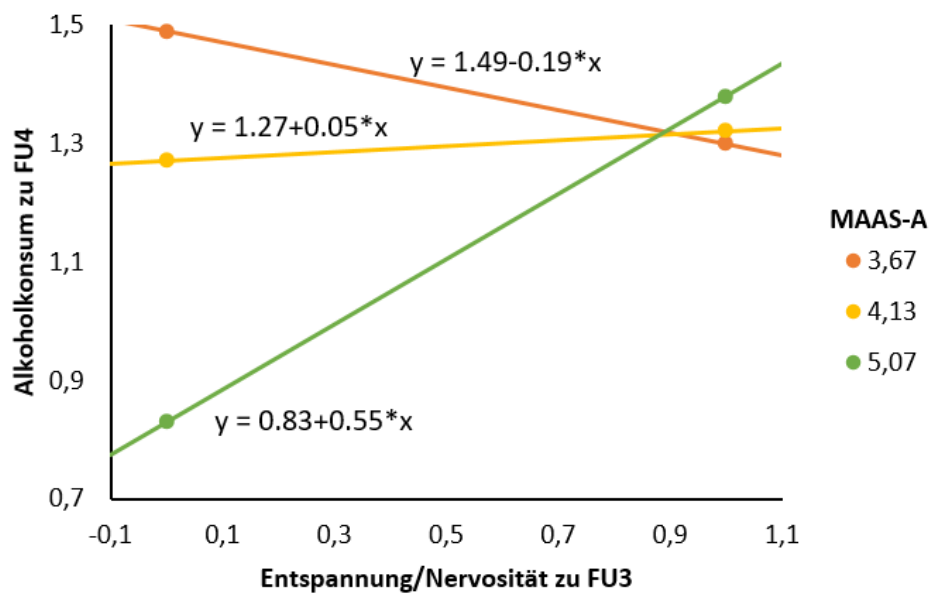

*Anmerkungen.* Höherer MAAS-A-Wert entspricht höherer Achtsamkeit. Regressionsgleichungen sind für jede MAAS-A-Gruppe abgetragen und bilden den allgemeinen Trend der Gruppe ab. Positiver Pol der X-Achse entspricht der Ausprägung „Entspannung“, negativer Pol entspricht der Ausprägung „Nervosität“.
